# Supplementary material for: TRAP-seq identifies cystine/glutamate antiporter as a driver of recovery from liver injury
Source: JCI journal article supplement (doi:10.1172/jci95120), 2018-03-08
Supplement: sd1 [file 1]

## SUPPLEMENTAL DATA

### Supplemental Figures

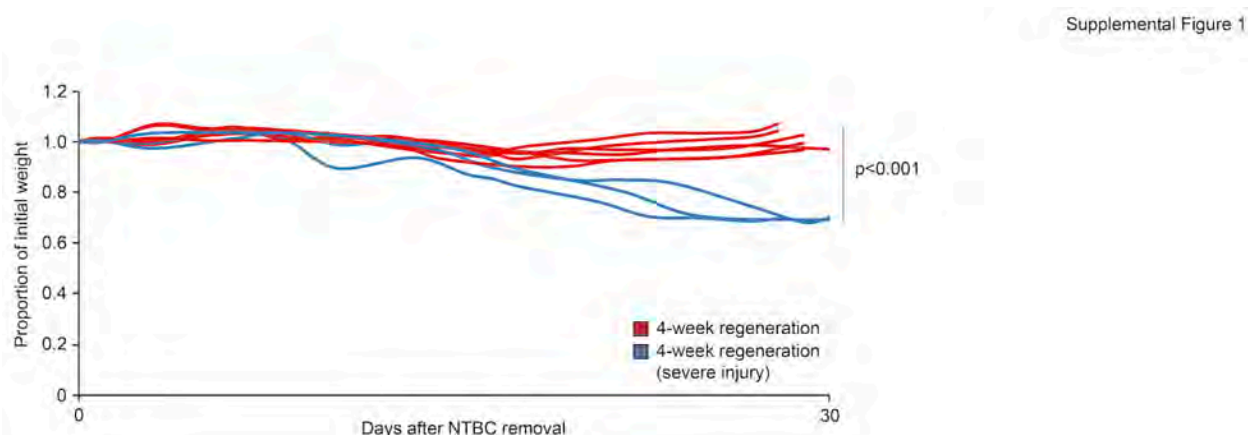

**Supplemental Figure 1. Mice in the 4-week regeneration after severe injury group exhibit significant weight loss.** The proportion of weight loss was normalized to the initial weight prior to plasmid injection and NTBC removal. Body weight was monitored three times per week after induction of liver injury and regeneration. After four weeks of injury and regeneration, three mice lost ~30% of the starting weight (blue), significantly different from mice in the 4-week regeneration group that underwent initial weight loss but restored body weight after four weeks (red). A two-sided, two-tailed Student's t-test was used to compare the proportion body weight in the 4-week regeneration (n=6) and 4-week regeneration after severe injury (n=3) groups.

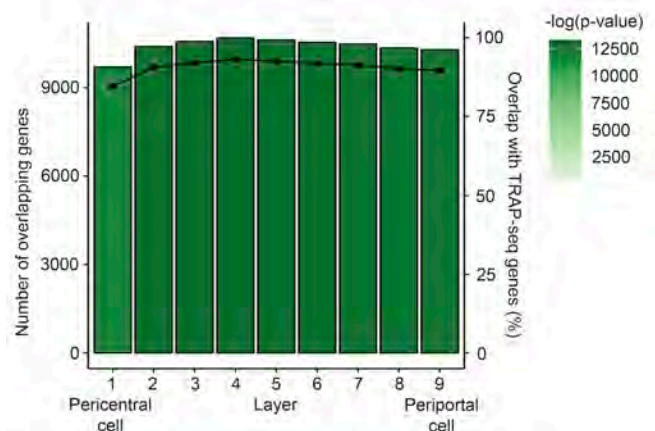

Supplemental Figure 2

**Supplemental Figure 2. Comparison of identified transcripts from single-cell RNA-seq (scRNA-seq) (41) shows significant overlap between TRAP-seq and all nine layers of scRNA-seq.** Genes identified in the quiescent samples from TRAP-seq was compared to that from scRNA-seq. Bar height indicates the number of overlapping genes identified in two techniques. Line and data points indicate the percentage overlap from each scRNA-seq layer compared to TRAP-seq. A hypergeometric test was used to calculate the significance of overlapping genes from the two sequencing methods.

Supplemental Figure 3

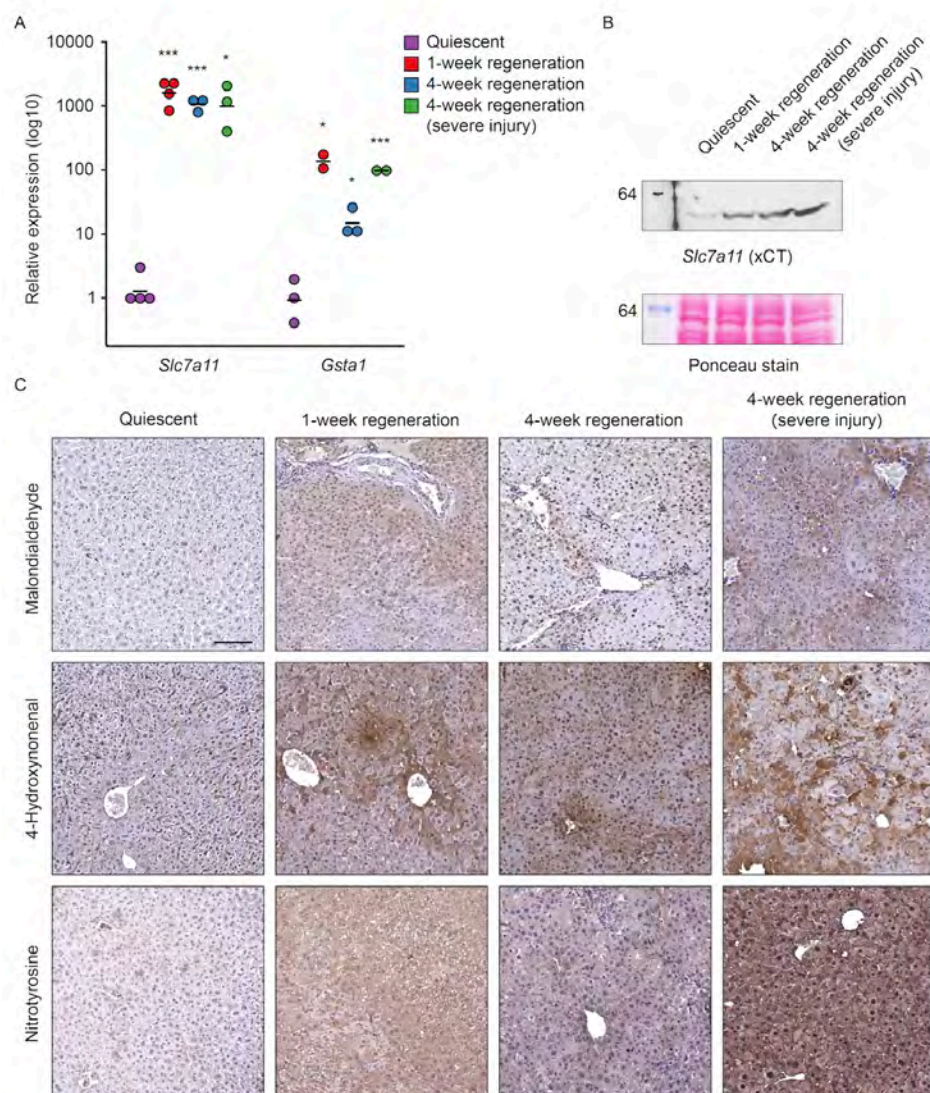

**Supplemental Figure 3. *Slc7a11* is activated at the transcript and protein levels under increased oxidative stress during liver regeneration.** (A) Real-time reverse transcription PCR (qRT-PCR) analysis showed continuous upregulation of *Slc7a11* and *Gsta1*, both involved in GSH metabolism, in repopulating hepatocytes. A two-sample, two-tailed Student's t-test was used to compare repopulating and quiescent hepatocytes. \*  $p < 0.05$ , \*\*\*  $p < 0.001$  ( $n = 4$ , quiescent and 1-week regeneration;  $n = 3$ , 4-week regeneration and 4-week regeneration after severe injury). (B) Western blot analysis confirmed activation of xCT in the regenerating liver. (C) IHC staining of lipid peroxidation markers (malondialdehyde and 4-hydroxynonenal) and protein nitration (nitrotyrosine) showed accumulation of redox metabolites in the injured, repopulating

liver compared to healthy, quiescent livers. Scale bar: 100 $\mu$ m.

Supplemental Figure 4

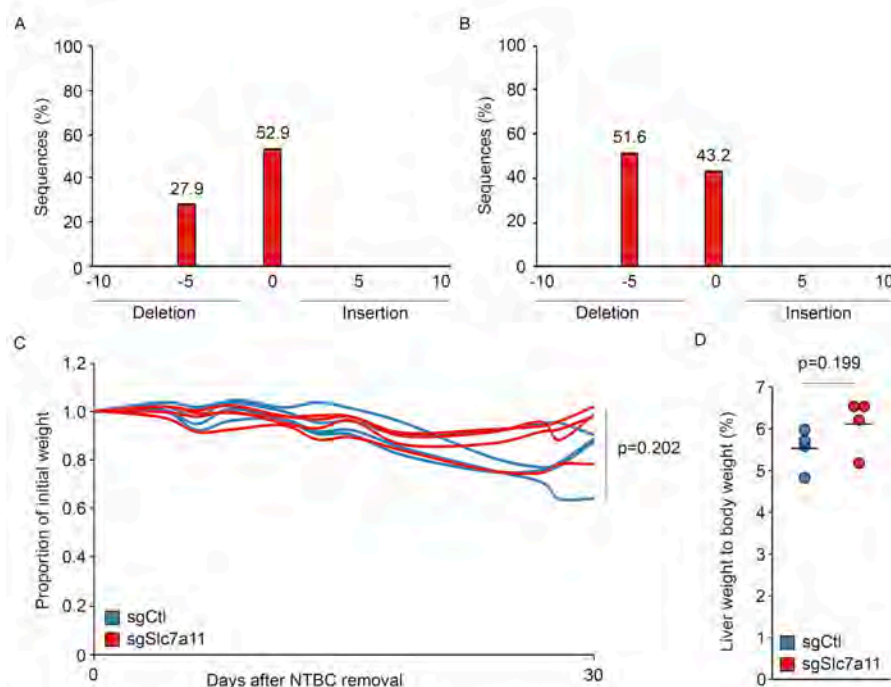

**Supplemental Figure 4. No significant differences in weight of mice with *Slc7a11* inhibition compared to control after 4 weeks of repopulation.** (A and B) Mutation analysis of *Slc7a11* exon one identified differential indel rates introduced by two single guide RNAs (sgRNA), sgSlc7a11-1 (A) and sgSlc7a11-2 (B). The x-axis indicates the number of nucleotides that were inserted or deleted and the y-axis indicates the percentage of mutation. (C) No weight differences during and after 4 weeks of repopulation, and no changes in liver weight to body weight ratio (D) in mice treated with sgRNA against *Slc7a11* (n=4) compared to control mice (n=4). A two-sample, two-tailed Student's t-test was used to compare mice treated with *Slc7a11* and control sgRNAs.

## Supplemental Tables

**Supplemental Table 1. Sequencing and alignment summary of the results from TRAP-seq in *Fah*<sup>-/-</sup> mice.**

**Supplemental Table 2. Top ten abundant transcripts identified in the quiescent livers.**

| Gene         | Transcript   | Quiescent | 1-week regeneration | 4-week regeneration | 4-week regeneration after severe injury |
|--------------|--------------|-----------|---------------------|---------------------|-----------------------------------------|
| <i>Apoc3</i> | NM_023114    | 22258.99  | 8284.08             | 16707.52            | 10378.80                                |
| <i>Apoa2</i> | NM_013474    | 18465.14  | 8906.01             | 8600.62             | 10388.86                                |
| <i>Fabp1</i> | NM_017399    | 14824.00  | 15222.48            | 10529.91            | 1586.67                                 |
| <i>Apoc1</i> | NM_001110009 | 12632.39  | 14177.49            | 6945.49             | 15360.81                                |
| <i>ApoE</i>  | NM_009696    | 12418.85  | 6753.43             | 5936.13             | 10505.54                                |
| <i>Apoc1</i> | NM_007469    | 11083.99  | 12446.11            | 6094.25             | 13496.84                                |
| <i>Alb</i>   | NM_009654    | 10481.08  | 5141.19             | 2962.66             | 9602.19                                 |
| <i>Trf</i>   | NM_133977    | 6906.36   | 1267.84             | 1930.87             | 3292.12                                 |
| <i>Gpx1</i>  | NM_008160    | 6150.21   | 4540.07             | 5258.64             | 5562.72                                 |
| <i>Apoc4</i> | NM_007385    | 5028.13   | 4193.01             | 4623.31             | 2596.70                                 |

Numbers represent the average fragments per kilobase of transcript per million (FPKM) reads in each regeneration group.

**Supplemental Table 3. FPKM of cell type-specific transcripts detected by TRAP-seq**

| Gene           | Quiescent | 1-week regeneration | 4-week regeneration | 4-week regeneration after severe injury | Cell type     |
|----------------|-----------|---------------------|---------------------|-----------------------------------------|---------------|
| <i>Alb</i>     | 10481.08  | 5141.19             | 2962.66             | 9602.19                                 | Hepatocyte    |
| <i>Ttr</i>     | 2639.60   | 3072.59             | 1212.62             | 5454.57                                 | Hepatocyte    |
| <i>Cyp2e1</i>  | 2424.01   | 588.72              | 1418.17             | 380.48                                  | Hepatocyte    |
| <i>Asgr1</i>   | 1190.04   | 865.69              | 1375.35             | 654.07                                  | Hepatocyte    |
| <i>Krt19</i>   | 0.18      | 0.16                | 0.15                | 1.97                                    | Cholangiocyte |
| <i>Pkd2</i>    | 1.28      | 0.71                | 0.79                | 1.56                                    | Cholangiocyte |
| <i>Krt7</i>    | 0.22      | 0                   | 0.22                | 0.89                                    | Cholangiocyte |
| <i>Cftr</i>    | 0         | 0                   | 0.02                | 0                                       | Cholangiocyte |
| <i>Des</i>     | 1.09      | 0.33                | 0.43                | 0.86                                    | Stellate cell |
| <i>Acta2</i>   | 0.41      | 0.35                | 0.27                | 0.34                                    | Stellate cell |
| <i>Col1a1</i>  | 0.04      | 0.42                | 0.26                | 1.22                                    | Stellate cell |
| <i>Cd68</i>    | 0.92      | 0.71                | 0.36                | 5.90                                    | Kupffer cell  |
| <i>Emr1</i>    | 0.67      | 0.28                | 0.27                | 0.84                                    | Kupffer cell  |
| <i>Cd163l1</i> | 0         | 0                   | 0.00                | 0.00                                    | Kupffer cell  |
| <i>Clec5a</i>  | 0         | 0                   | 0.02                | 0.05                                    | Kupffer cell  |

**Supplemental Table 4. Fold change and read counts of transcripts identified with TRAP-seq.****Supplemental Table 5. Genes enriched in the KEGG pathway 'metabolic pathway' that were upregulated and downregulated, respectively.****Supplemental Table 6. Top congruently upregulated and downregulated genes ranked from the *Fah*<sup>-/-</sup> model viewpoint and comparison with the PHx model.****Supplemental Table 7. A list of oligos used in this study.**
